# Supplementary material
Source: HighWire-hosted journal article supplement (https://ard.bmj.com/content/78/5/586)

Poppelaars et al. Appendix 2.

Survival plots of patients at relevant levels of factors in the regression model.


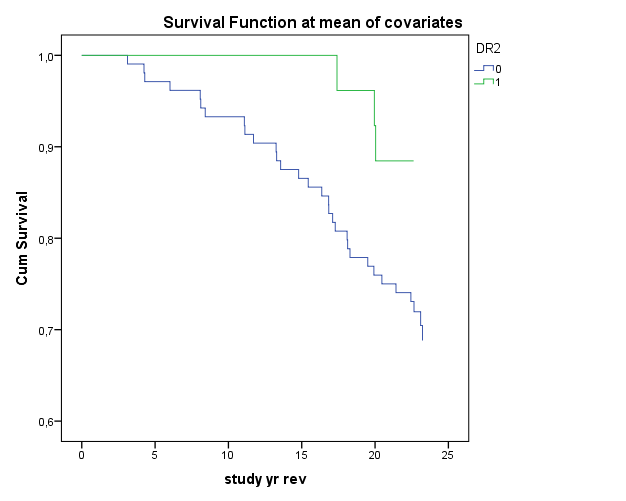


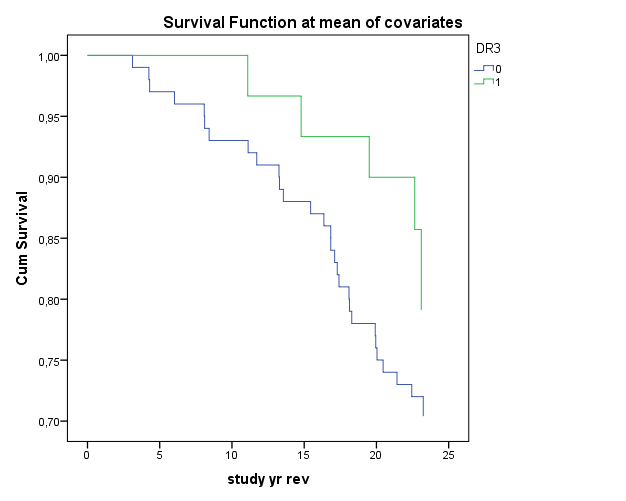


∆S28: change of joint damage score at week 28.


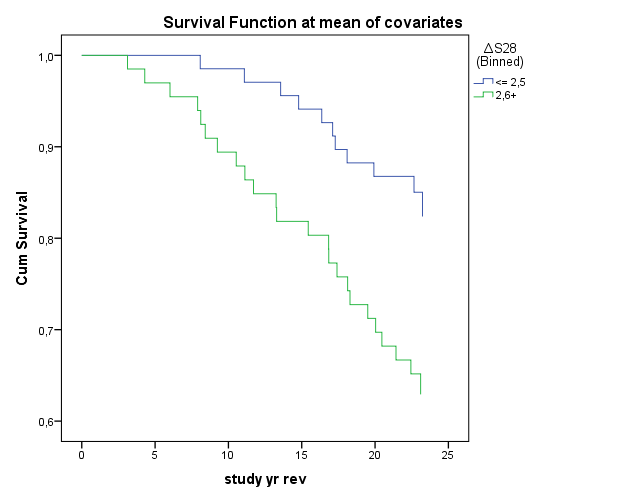


HAQ: Health Assessment Questionnaire (functional disability scale).


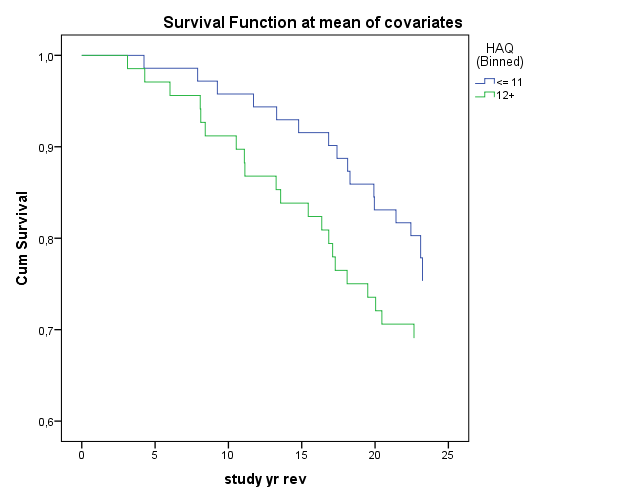


r st kl: disease duration from start of symptoms.


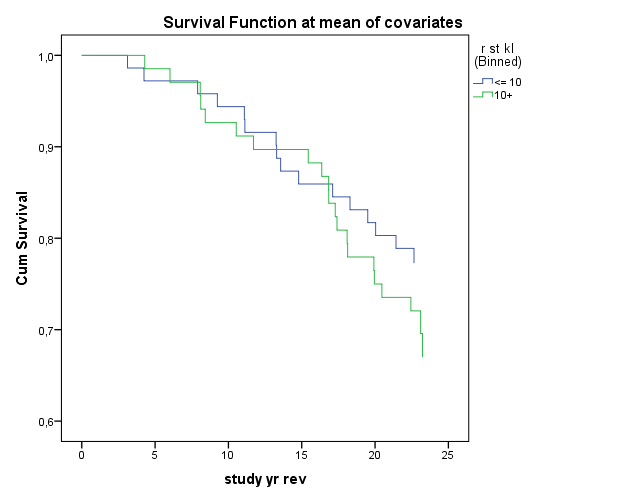


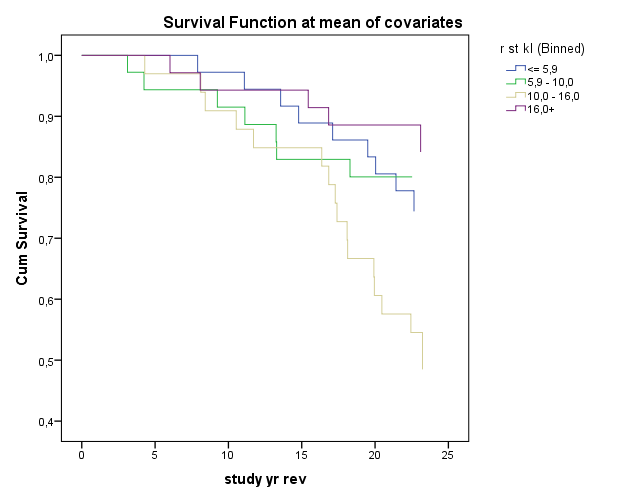

Supplement: inline-supplementary-material-2 [file inline-supplementary-material-2.docx]
